# Supplementary material for: The Effect of TAVR on Left Ventricular and Left Atrial Mechanics in Patients with Aortic Stenosis
Source: MDPI journal article supplement (doi:10.3390/jcdd9020035), 2022-01-21
Supplement: s1 [file s1]

**Table S1.** Symptoms and change in echocardiographic findings, post TAVR according to valve type.

| Group Characteristics                                                    | Balloon Expandable Valve<br>(Edwards Sapien 3/Ultra) | Self-Expandable Valve<br>(Medtronic Evolut R Pro) | <i>p</i> -value |
|--------------------------------------------------------------------------|------------------------------------------------------|---------------------------------------------------|-----------------|
| <b>Total patients</b>                                                    | 46 (100%)                                            | 62 (100%)                                         |                 |
| <b>Median % Change in LA Strain at End Diastole (IQR)</b>                |                                                      |                                                   |                 |
| Reservoir                                                                | +11% (36%)                                           | +13% (35%)                                        | 0.7             |
| Conduit                                                                  | +7.0% (79%)                                          | +22% (57%)                                        | 0.3             |
| Contractile                                                              | +12% (94%)                                           | +20% (119%)                                       | 0.4             |
| <b>Median % Change in LA Strain at Onset of Atrial Contraction (IQR)</b> |                                                      |                                                   |                 |
| Reservoir                                                                | +7.8% (36%)                                          | +11% (30%)                                        | 0.7             |
| Conduit                                                                  | +5.9% (77%)                                          | +16% (59%)                                        | 0.3             |
| Contractile                                                              | +10% (88%)                                           | +18% (103%)                                       | 0.4             |
| <b>Median % Change in Left Atrial Volume Index (IQR)</b>                 | -1.8% (32%)                                          | -7.1% (41%)                                       | 0.8             |
| <b>Median % Change in LV GLS (IQR)</b>                                   | +17% (24%)                                           | +16% (32%)                                        | 0.9             |
| <b>Median % Change in LV Ejection Fraction (IQR)</b>                     | +4.4% (20%)                                          | +0% (18%)                                         | 0.7             |
| <b>Median % Change in Mean Aortic Gradient (IQR)</b>                     | -72% (18%)                                           | -83% (12%)                                        | <0.01           |
| <b>NYHA Class III/IV Post-Op</b>                                         | 3(7.5%)                                              | 9 (16%)                                           | 0.4             |
